# Supplementary material
Source: publisher figshare collection journal article supplement (https://acs.figshare.com/ndownloader/files/4233583)
Supplement: Supplementary file 1 [file 4233583]

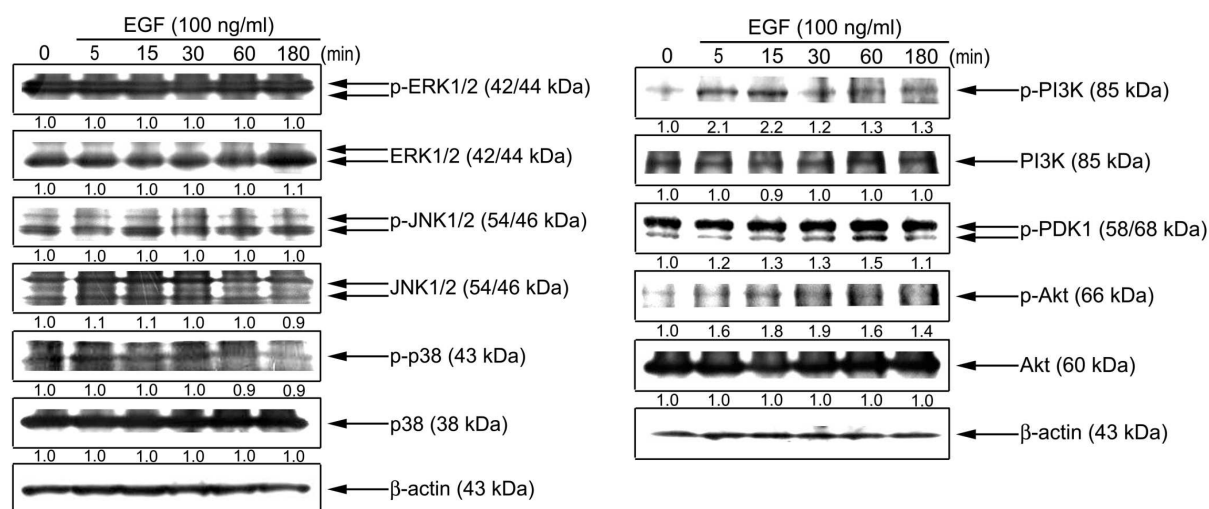

Supplemental Figure 1. Time-course study of the EGFR signaling molecules. MDA-MB-231 cells were serum-starved for 24 hr followed by EGF (100 ng/mL) stimulation for 0 – 180 min. Total protein lysates were analyzed for the expression of p-ERK, ERK, pJNK, JNK, p-p38, p38, p-PI3K, PI3K, p-PDK1, pAkt, and Akt with respective antibodies as described in Materials and Methods.
